# Supplementary material
Source: PubMed Central journal article supplement (PMC4334709)

**Supplemental Fig. 1** Two-way Manhattan plot of P-values from single-SNP associations with trait-specific phenotype among controls (X-axis) and case-control status (Y-axis), Group Health, 1998-2007.

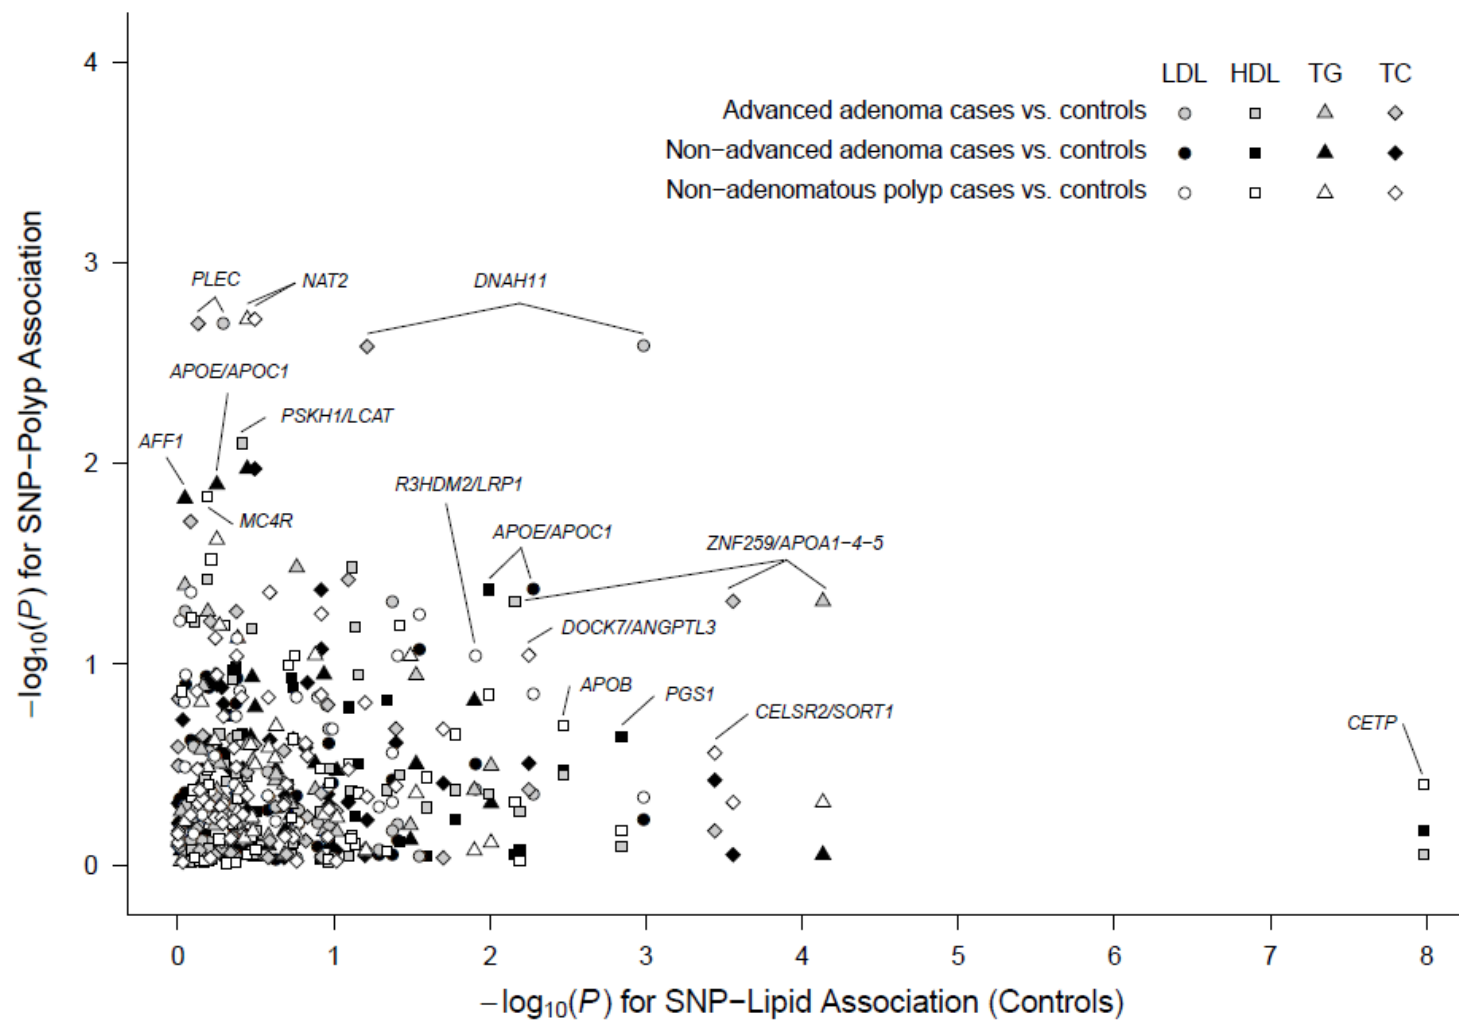

**Supplemental Fig. 2** Estimated per-allele odds ratios of advanced adenomas vs. controls (black triangles), non-advanced adenomas vs. controls (black circles), and non-adenomatous polyps vs. controls (white circles), plotted against the association per allele with the trait reported by the GLGC GWAS (LDL SNPs in A, HDL SNPs in B, TG SNPs in C, and TC SNPs in D) Group Health, 1998-2007. Estimates are adjusted for age, sex, race, and data-collection period. P-values are for the inverse-variance weighted slope.

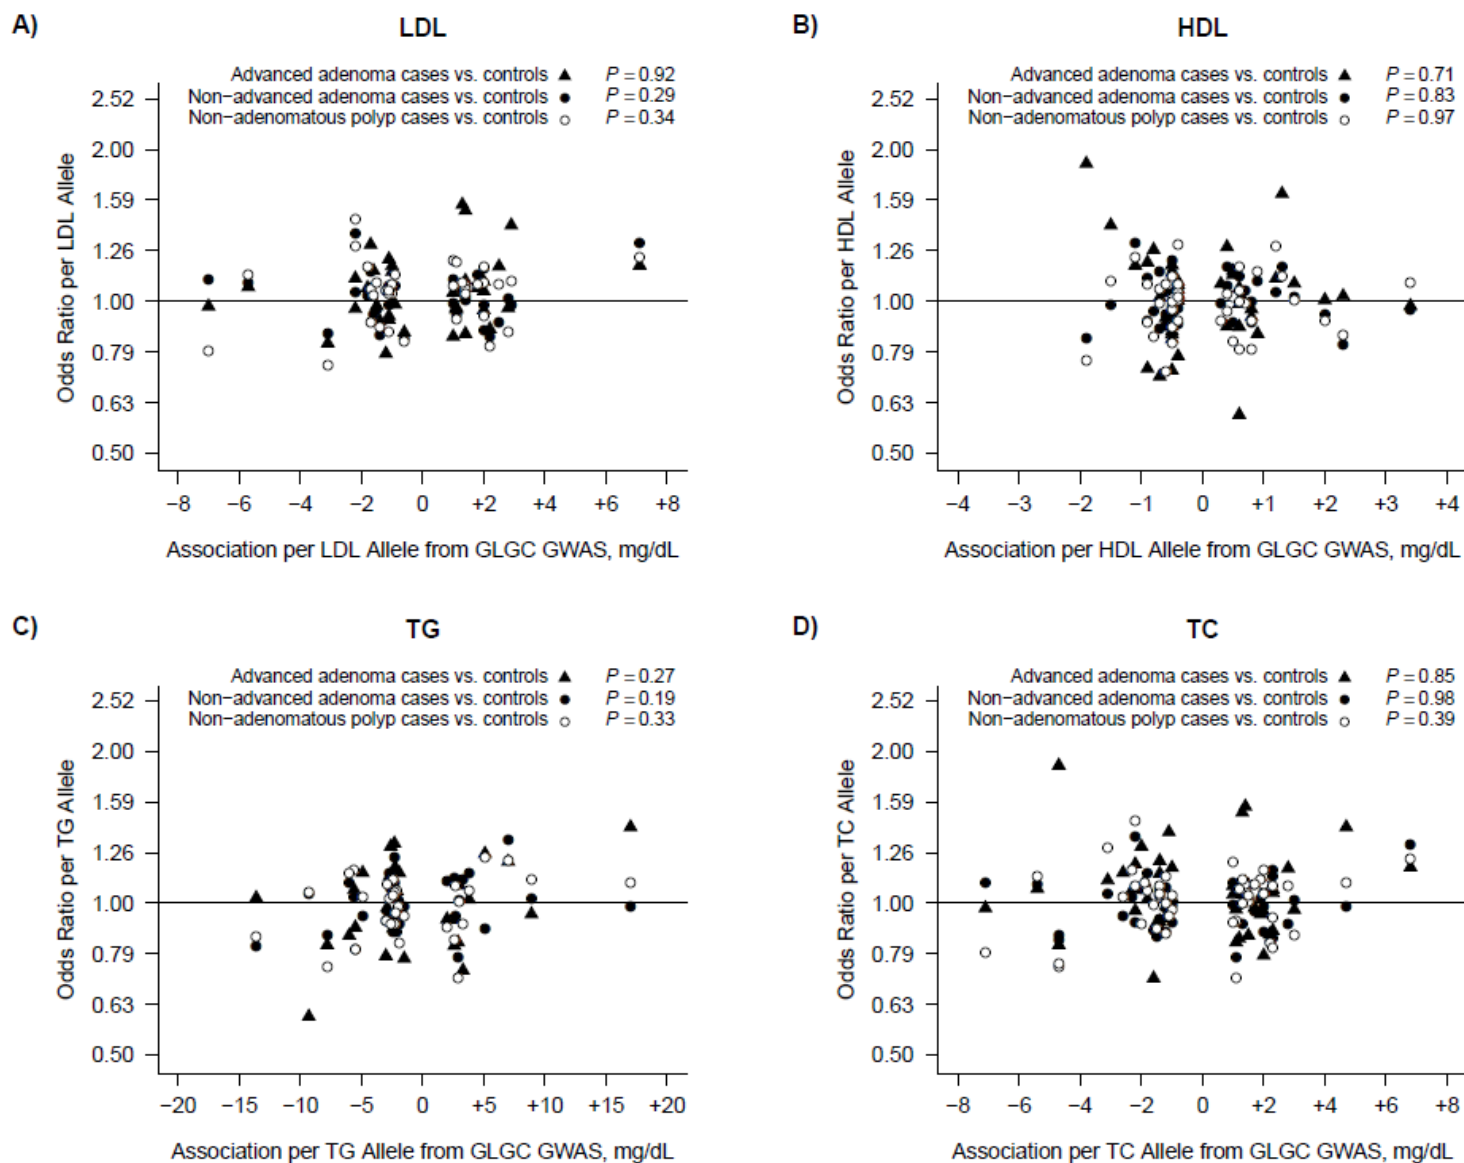

Supplement: NIHMS658491-supplement-10552_2015_526_MOESM1_ESM.pdf [file NIHMS658491-supplement-10552_2015_526_MOESM1_ESM.pdf]
